# Supplementary material for: Genetically diverse Pseudomonas aeruginosa populations display similar transcriptomic profiles in a cystic fibrosis explanted lung
Source: PubMed Central journal article supplement (PMC6667473; doi:10.1038/s41467-019-11414-3), 2019-07-30
Supplement: 41467_2019_11414_MOESM1_ESM.pdf [file 41467_2019_11414_MOESM1_ESM.pdf]

## **Supplementary information**

**Genetically diverse *Pseudomonas aeruginosa* populations display similar transcriptomic profiles in a cystic fibrosis explanted lung.**

**Kordes *et al.***

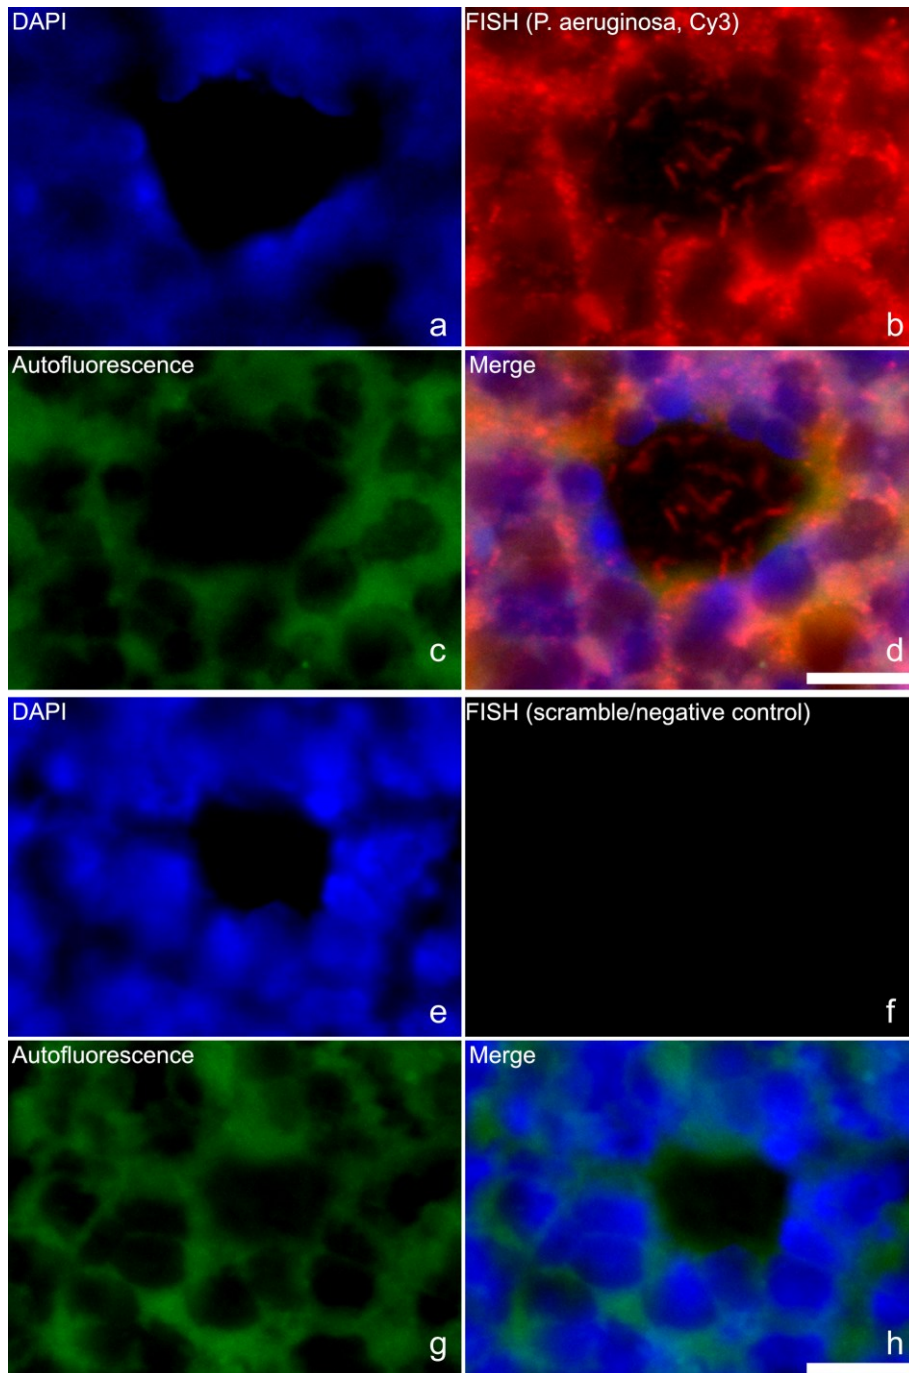

**Supplementary Figure 1 Histological analysis of the CF-lung.** (a-d) Bacterial colonies can be visualized by fluorescence *in situ* hybridization with Cy3 labelled oligonucleotide probes targeted against sequences on the 16S ribosomal RNA specific for *P. aeruginosa*. Nuclear counterstain by DAPI. Green shows autofluorescence in the FITC filter. (e-h) Bacterial colonies in the negative control *in situ* hybridization with Cy3 labelled scrambled oligonucleotide targeting no specific sequence. Nuclear counterstain by DAPI. Green shows autofluorescence in the FITC filter. Scalebars are 10  $\mu$ m.

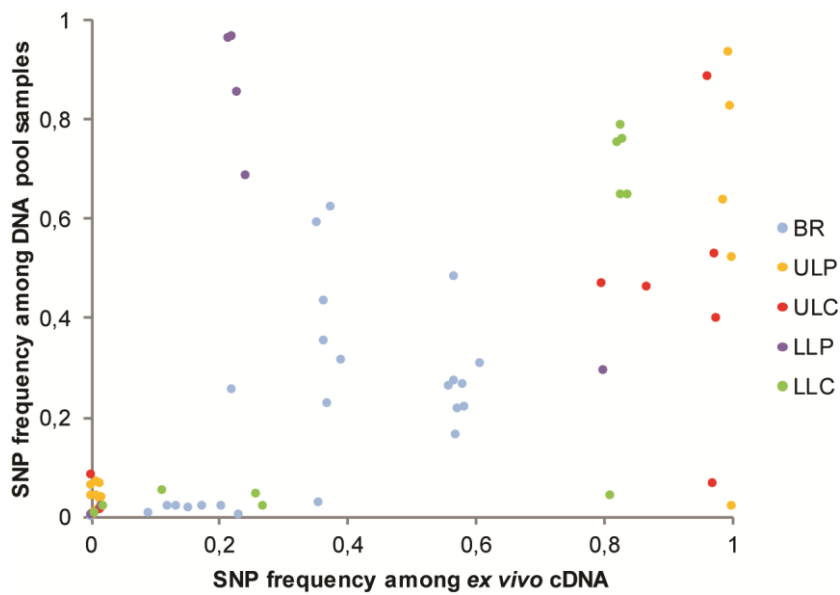

**Supplementary Figure 2 Correlation of the mutation frequencies of in vivo cDNA samples (RNASeq) and DNA sequences of genome pool samples.** SNP frequencies for each SNP position from cDNA sequencing (RNASeq) and the corresponding frequencies of DNA sequencing of the genome pool samples per compartment are plotted (cDNA coverage was at least 50 reads and at least 20 reads for the LLP sample). Source data are provided as a Source Data file

The correlation between cDNA and genome SNPs increased with higher cDNA coverage. In the BR, ULP and ULC sample we found a correlation of 0.6497, 0.9599 and 0.8929, respectively (with at least 100 reads, adjusted p value < 0.05). In the LLP sample we found a correlation of 0.1272 in SNP positions with a minimum of 20 cDNA reads (adjusted p value = 0.78). In the LLC sample we found a correlation of 0.8335 in SNP positions with a minimum of 20 cDNA reads (adjusted p value < 0.05).

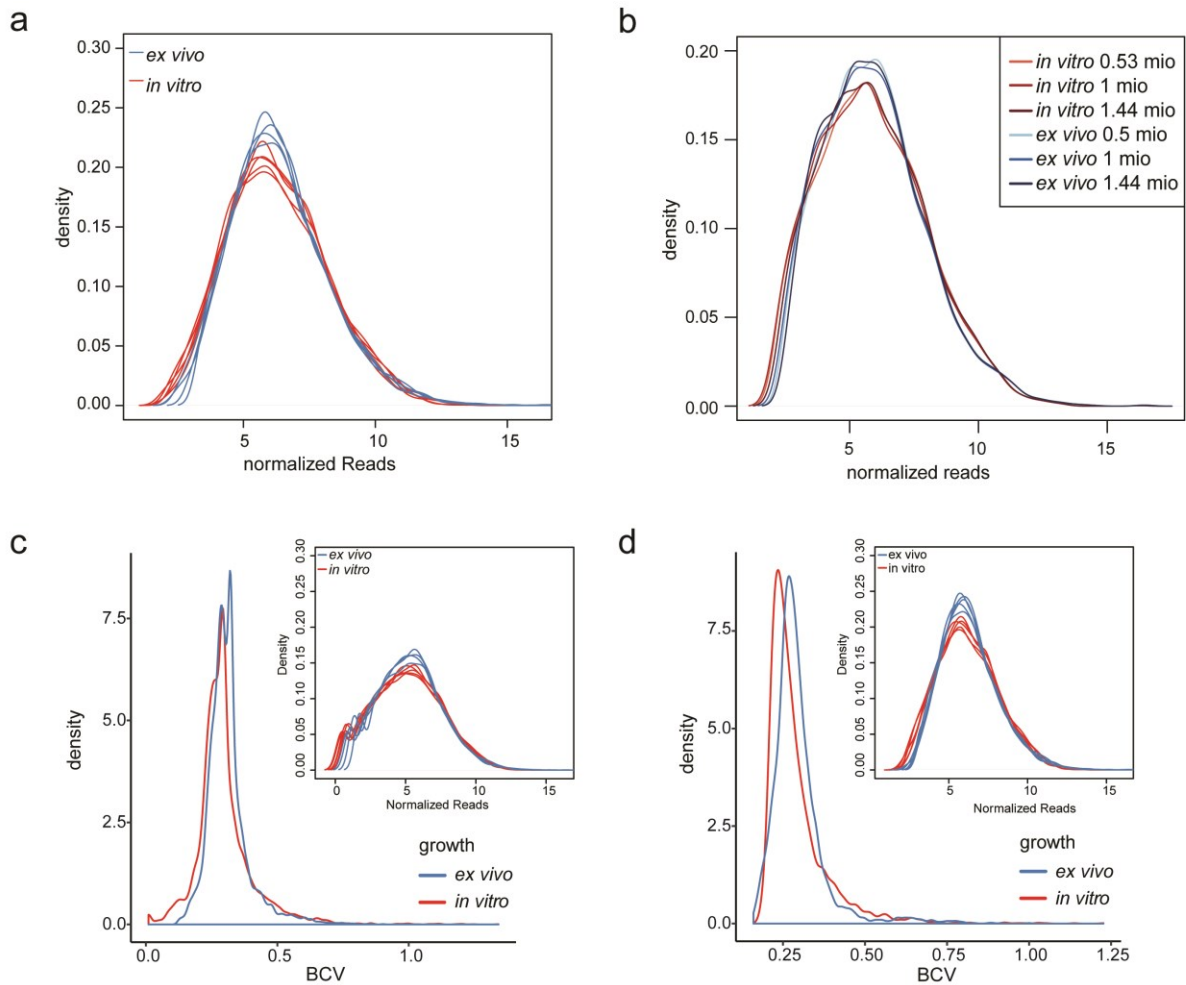

**Supplementary Figure 3 Effect of data processing on sample distribution.** Distribution of normalized reads (a and inset plots of c and d) and the biological coefficient of variation (c and d). (b) Effect of subsampling on sample distribution. An *in vivo* and *in vitro* sample (ULP) was subsampled to 0.53 mio (*in vivo* ULP reads), 1 mio, and 1.44 mio reads, respectively. y axis: density; x axis: normalized log<sub>2</sub> reads (cpm and TMM using edgeR). Remaining genes after filtering: 4162 (0.53 mio reads); 4273 (1 mio reads); 4166 (1.44 mio reads). (c) Data were subsampled as shown in Fig. 5a, but without additional read filter. (d) Data were not subsampled, but reads were filtered by removing genes with less than 5 normalized reads (cpm) in all samples. Source data are provided as a Source Data file.

**Supplementary Table 1 Differentially expressed genes in ANOVA-like analysis.**

|               | log2FC             |                   |                         | adjusted p value |
|---------------|--------------------|-------------------|-------------------------|------------------|
|               | BR versus peripher | BR versus central | peripher versus central |                  |
| PA3305.1,phrS | 3.8                | 2.0               | -1.8                    | 0.019            |
| PA4587,ccpR   | 3.6                | 1.7               | -1.9                    | 0.019            |
| PA3871        | 3.2                | 1.6               | -1.6                    | 0.030            |
| PA3877,narK1  | 3.3                | 1.6               | -1.7                    | 0.030            |
| PA2119        | 2.9                | 1.8               | -1.1                    | 0.030            |
| PA2753        | 4.2                | 1.6               | -2.6                    | 0.030            |
| PA3613        | 2.7                | 1.6               | -1.1                    | 0.030            |
| PA3874,narH   | 3.3                | 1.4               | -1.9                    | 0.033            |
| PA3872,narI   | 3.0                | 1.3               | -1.7                    | 0.033            |
| PA3875,narG   | 3.4                | 1.5               | -1.9                    | 0.033            |
| PA5027        | 3.2                | 1.9               | -1.3                    | 0.033            |
| PA4328        | 3.1                | 1.9               | -1.2                    | 0.033            |
| PA1546,hemN   | 3.0                | 1.5               | -1.6                    | 0.033            |
| PA3337,rfaD   | 3.3                | 1.5               | -1.8                    | 0.034            |
| PA3870,moaA1  | 3.0                | 1.2               | -1.8                    | 0.036            |

**Supplementary Table 2 Functional enrichment (GO biological process) of 100 genes with lowest p values and log2FC of  $\geq 1$** 

| GO term                                            | conditions          | regulation | FC enrichment | adjusted p value |
|----------------------------------------------------|---------------------|------------|---------------|------------------|
| siderophore transport                              | peripher vs central | up         | 13.5          | 0.00124          |
| pyoverdine biosynthetic process                    | peripher vs central | up         | 18.5          | 0.00994          |
| protein secretion by the type III secretion system | peripher vs central | up         | 10.2          | 0.00994          |
| cell surface receptor signaling pathway            | peripher vs central | up         | 13.0          | 0.01885          |
| arginine deiminase pathway                         | peripher vs central | down       | 36.4          | 0.00003          |
| response to stress                                 | peripher vs central | down       | 13.0          | 0.00072          |
| nitrogen compound metabolic process                | peripher vs central | down       | 6.7           | 0.01296          |
| nitrate metabolic process                          | peripher vs central | down       | 36.4          | 0.01296          |
| pyoverdine biosynthetic process                    | upper vs lower      | up         | 26.0          | 0.00002          |
| siderophore transport                              | upper vs lower      | up         | 13.7          | 0.00008          |
| cell surface receptor signaling pathway            | upper vs lower      | up         | 18.2          | 0.00008          |
| heme transport                                     | upper vs lower      | up         | 15.6          | 0.01263          |
| negative regulation of protein secretion           | upper vs lower      | up         | 13.7          | 0.01585          |
| response to stimulus                               | upper vs lower      | up         | 4.2           | 0.03492          |
| regulation of iron ion transport                   | upper vs lower      | up         | 18.2          | 0.04810          |
